# Supplementary material for: Differential circulating proteomic responses associated with ancestry during severe COVID-19 infection
Source: bioRxiv or medRxiv preprint supplement (doi:10.1101/2024.07.09.24310087), 2024-07-23
Supplement: Supplementary file [file media-1.pdf]

Supplementary Table 1: Unique patient characteristics in the BQC19, stratified by ancestry.

|                                       | <b>European</b> | <b>African</b> | <b>East Asian</b> | <b>Middle Eastern</b> | <b>Admixed American</b> | <b>South Asian</b> | <b>Admix/ Other</b> |
|---------------------------------------|-----------------|----------------|-------------------|-----------------------|-------------------------|--------------------|---------------------|
| Overall <i>n</i> (%)                  | 584 (64%)       | 147 (16%)      | 53 (6%)           | 46 (5%)               | 33 (4%)                 | 19 (2%)            | 27 (3%)             |
| Median Age (IQR)                      | 73 (62 – 82)    | 55 (43 – 66)   | 58 (51 – 73)      | 74 (54 – 82)          | 56 (53 – 68)            | 54 (38 – 66)       | 54 (37 – 83)        |
| # of Females (%)                      | 273 (47 %)      | 75 (51 %)      | 33 (61 %)         | 22 (48%)              | 13 (39%)                | 7 (37%)            | 15 (56%)            |
| Severe COVID (%)                      | 175 (30%)       | 61 (41%)       | 19 (35%)          | 17 (37%)              | 13 (39%)                | 5 (26%)            | 1 (3.7%)            |
| Median Days since Symptom Onset (IQR) | 10 (4 – 16)     | 10 (7 – 16)    | 9 (6 – 13)        | 4 (1 – 14)            | 16 (9 – 18)             | 11 (5 – 17)        | 9 (6 – 14)          |

Numbers are presented as count (percentage) or (IQR). IQR is the interquartile range, which is the spread of the middle half of the distribution of the population.

## Supplemental Formula and Code

### Formula

$$Z = \frac{\hat{b}_1 - \hat{b}_2}{\sqrt{SE_{\hat{b}_1}^2 + SE_{\hat{b}_2}^2}}$$

Z-test used to determine how different one ancestral model was from another.  $\hat{b}_1$  and  $\hat{b}_2$  are the estimated effect sizes of severe COVID-19 illness on protein level in models 1 and 2 respectively and  $SE_{\hat{b}_1}$  and  $SE_{\hat{b}_2}$  are for the standard errors of these respective estimates.  $Z^2$  follows a chi-squared distribution with one degree of freedom.

### LMM Formula:

Protein Level =  $\beta_0 + \beta_1 \text{COVID} + \beta_2 \text{Age} + \beta_3 \text{Sex} + \beta_4 \text{DSO} + (1 | \text{BQCID})$

DSO: Days since symptom onset

BQCID: Unique Patient ID which lets us track which samples come from each patient

Supplementary Figure 1: UMAP projection of the population of the BQC19

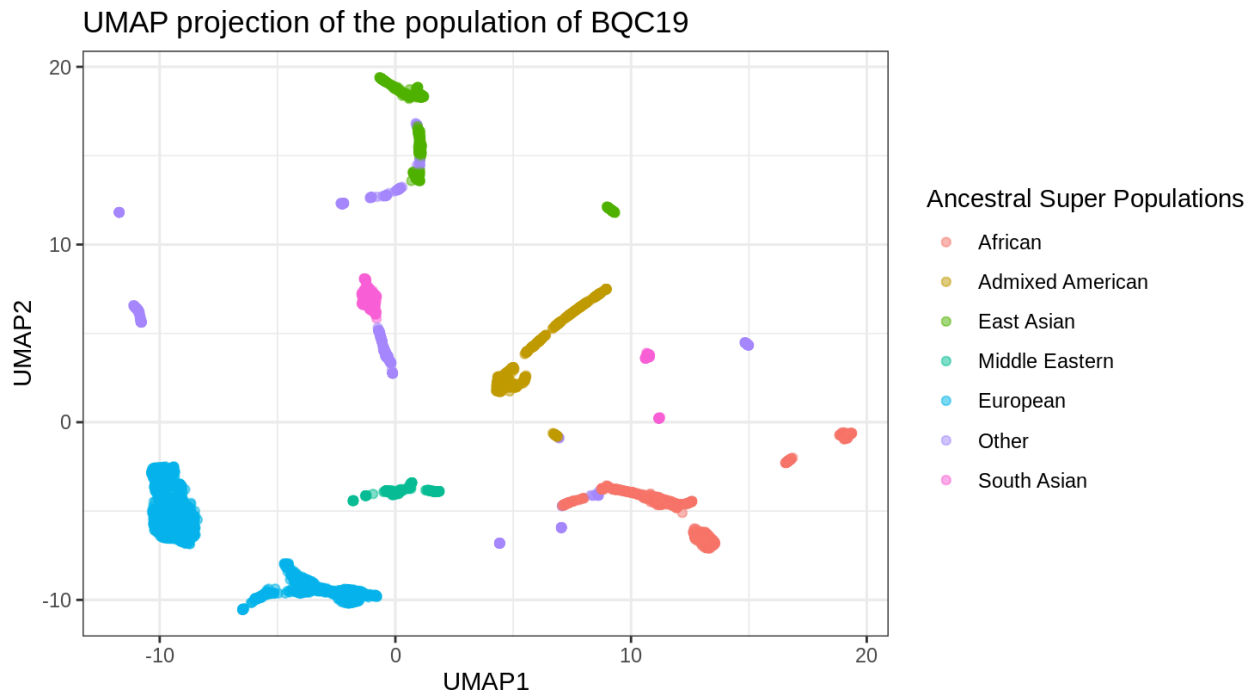

UMAP of all BQC19 tested patients sorted into the six super population as defined by HGI and an unclassified ("other") population.
